# Supplementary material for: Nanostructured, mesoporous Au/TiO2 model catalysts – structure, stability and catalytic properties
Source: publisher site journal article supplement (doi:10.3762/bjnano.2.63), 2011-09-15
Supplement: Additional file 1 [file 2190-4286-2-63-S1.pdf]

# **Nanostructured, mesoporous Au/TiO<sub>2</sub> model catalysts – structure, stability and catalytic properties**

Matthias Roos<sup>1</sup>, Dominique Böcking<sup>2</sup>, Kwabena Offeh Gyimah<sup>1</sup>, Gabriela Kucerova<sup>1</sup>,  
Joachim Bansmann<sup>1</sup>, Johannes Biskupek<sup>4</sup>, Ute Kaiser<sup>4</sup>, Nicola Hüsing<sup>3</sup>  
and R. Jürgen Behm<sup>\*1</sup>

Address: <sup>1</sup>Institute of Surface Chemistry and Catalysis, Ulm University, D-89069 Ulm,  
Germany; <sup>2</sup>Institute of Inorganic Chemistry, Ulm University, D-89069 Ulm, Germany;  
<sup>3</sup>Materials Chemistry, Paris-Lodron University Salzburg, Austria and <sup>4</sup>Transmission  
Electron Microscopy Group, Ulm University, D-89069 Ulm, Germany

Email: R. Jürgen Behm\* - juergen.behm@uni-ulm.de

\* Corresponding author

## **Details of sorption measurements**

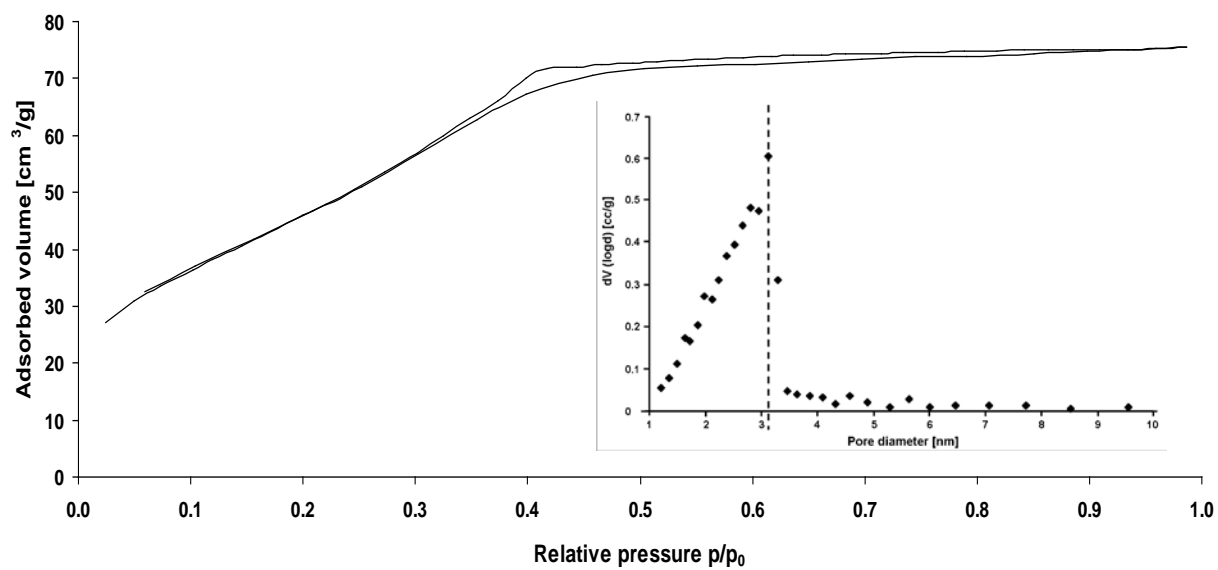

**Figure S1:** Nitrogen sorption measurement of porous titania. The inset shows the pore size distribution evaluated by the BJH method from the desorption branch of the isotherm.
